# Supplementary material for: Synergistic effects of bithiophene ammonium salt for high-performance perovskite solar cells
Source: Royal Society of Chemistry journal article supplement (doi:10.1039/d2ta01349e), 2022-01-01
Supplement: d2ta01349e1.pdf [file d2ta01349e1.pdf]

## Supporting Information

### Synergistic effects of bithiophene ammonium salt for high-performance perovskite solar cells

Chang Xu,<sup>a</sup> Lijian Zuo,<sup>\*ab</sup> Pengjie Hang,<sup>c</sup> Xiangwei Guo,<sup>bf</sup> Youwen Pan,<sup>a</sup> Guanqing Zhou,<sup>d</sup> Tianyi Chen,<sup>a</sup> Benfang Niu,<sup>a</sup> Xingqi Xu,<sup>g</sup> Zijian Hong,<sup>\*f</sup> Dawei Wang,<sup>g</sup> Haiming Zhu,<sup>bc</sup> Xuegong Yu,<sup>\*c</sup> Deren Yang,<sup>c</sup> Hongzheng Chen<sup>\*a</sup>

*(a State Key Laboratory of Silicon Materials, MOE Key Laboratory of Macromolecular Synthesis and Functionalization, Department of Polymer Science and Engineering, Zhejiang University, Hangzhou 310027, P. R. China.*

*b Zhejiang University-Hangzhou Global Scientific and Technological Innovation Center, Hangzhou 310014, P. R. China.*

*c State Key Laboratory of Silicon Materials and School of Materials Science and Engineering, Zhejiang University, Hangzhou 310027, P. R. China.*

*d G. Zhou*

*Frontiers Science Center for Transformative Molecules, School of Chemistry and Chemical Engineering, Shanghai Jiao Tong University, Shanghai 200240, P. R. China.*

*e Prof. H. Zhu*

*Department of Chemistry, Zhejiang University, Hangzhou 310027, P. R. China.*

*f Lab of Dielectric Materials, School of Materials Science and Engineering, Zhejiang University, Hangzhou 310027, P. R. China.*

*g Interdisciplinary Center for Quantum Information and Zhejiang Province Key Laboratory of Quantum Technology and Device, Department of Physics, Zhejiang University, Hangzhou 310027, P. R. China.)*

#### 1. Experimental Procedures

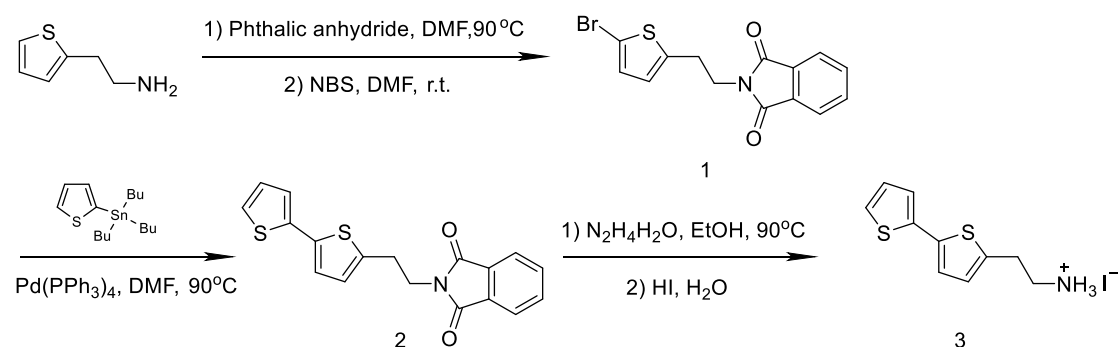

**Scheme S1** Synthetic routes of the 2TEAI (3).

#### 2-(2-(5-bromothiophen-2-yl)ethyl)isoindoline-1,3-dione (1)

To a solution of 2-(thiophene-2-yl)ethan-1-amine (20 g, 157 mmol) in DMF (150 mL) was added phthalic anhydride (23.1 g, 157 mmol). After stirring at 165 °C for 4 hs, NBS (28.0 g, 157 mmol) was added at 0 °C. The reaction mixture was kept at 0 °C for 5 hs and diluted with CH<sub>2</sub>Cl<sub>2</sub>, washed with saturated NaHCO<sub>3</sub> aqueous solution and water, and then dried over Na<sub>2</sub>SO<sub>4</sub>. After removing the solvent by evaporation, the crude product was purified by silica gel chromatography using petroleum ether/CH<sub>2</sub>Cl<sub>2</sub> (1/2, V/V) as the eluent to give the desired product **1** as a white solid (31.2 g, 65.0% yield). <sup>1</sup>H NMR (400 MHz, CDCl<sub>3</sub>, rt): 7.85 (dd, *J* = 5.4, 3.0 Hz, 2H), 7.72 (dd, *J* = 5.5, 3.0 Hz, 2H), 6.85 (d, *J* = 3.7 Hz, 1H), 6.63 (d, *J* = 3.7, 1.0 Hz, 1H), 3.93 (m 2H), 3.19 - 3.12 (m, 2H).

***2-([2,2'-bithiophen]-5-yl)ethan-1-aminium iodide (3)***

To a solution of compound **1** (10 g, 29.7 mmol) and tributyl(thiophene-2-yl)stannane (14.84 g, 29.7 mmol) in toluene/DMF (4/1, V/V, 200 mL) was added Pd(PPh<sub>3</sub>)<sub>4</sub> (1.60 g, 1.40 mmol) under a nitrogen atmosphere. After stirring at 120 °C for 8 hs, the reaction mixture was diluted with hexane/ethyl acetate (1/1, V/V), washed with water, and then dried over Na<sub>2</sub>SO<sub>4</sub>. After removing the solvent by evaporation, the crude product was purified by silica gel chromatography using hexane/ethyl acetate (3/1, V/V) as the eluent to give the desired product as a pale yellow solid (8.65g, 85.9% yield), getting the product **2**. To a solution of compound **2**, 100 ml HI solution was added, after stirring for 1 h, yellow solid was obtained. Recrystallizing three times with DMF, product **3** was obtained (5.78 g, 67.2%). <sup>1</sup>H NMR (400 MHz, DMSO-*d*<sub>6</sub>) δ 7.80 (s, 3H), 7.50 (dd, *J* = 5.1, 1.2 Hz, 1H), 7.25 (dd, *J* = 3.6, 1.2 Hz, 1H), 7.18 (d, *J* = 3.7 Hz, 1H), 7.08 (dd, *J* = 5.1, 3.6 Hz, 1H), 6.94 (d, *J* = 3.6 Hz, 1H), 3.08 (m, 4H).

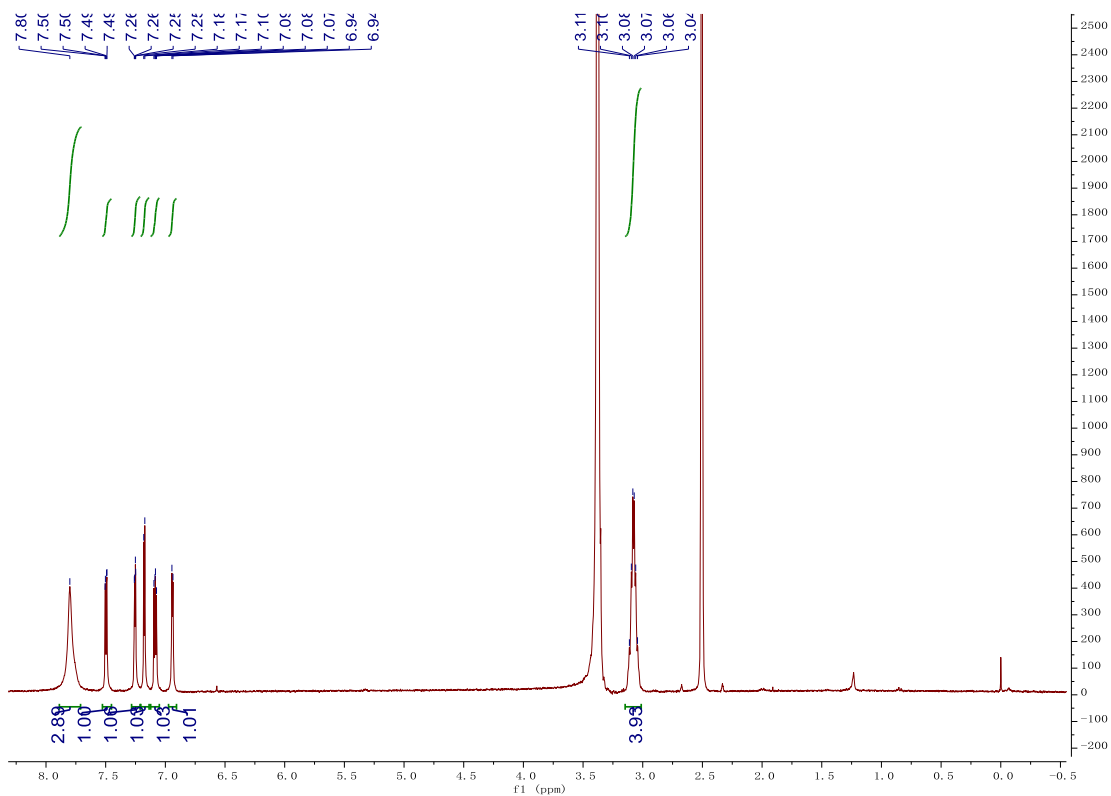

**Fig. S1**  $^1\text{H}$  NMR spectrum of 2TEAI (3) in  $\text{DMSO-}d_6$ .

## 2. Results and Discussion

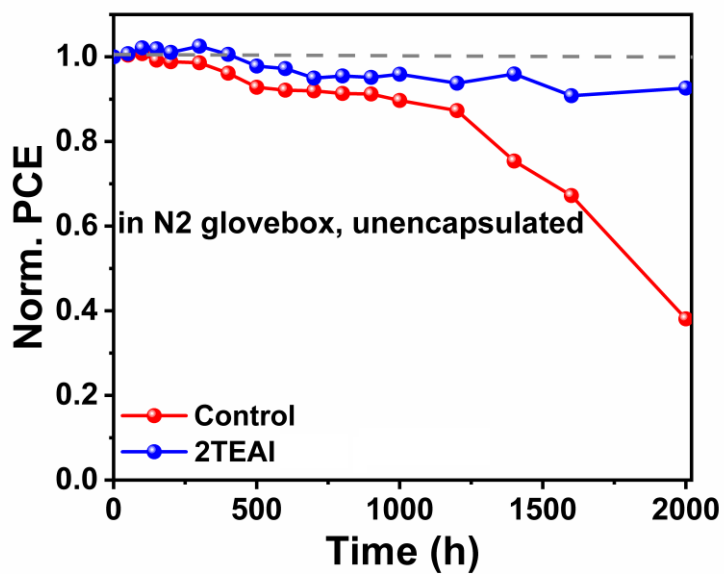

**Fig. S2** Long-term stability of the devices with and without 2TEAI modification, which

were stored in an N<sub>2</sub> glovebox without encapsulation.

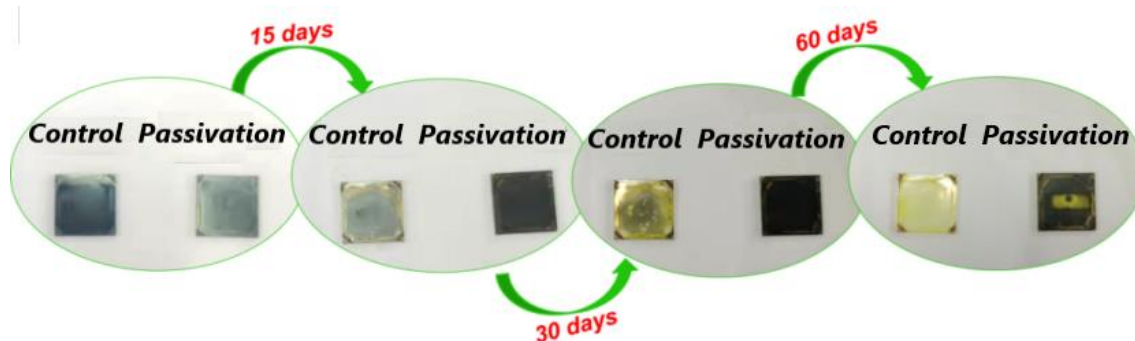

**Fig. S3** The degradation behavior of the control device and **2TEAI** modified device in the ambient air environment.

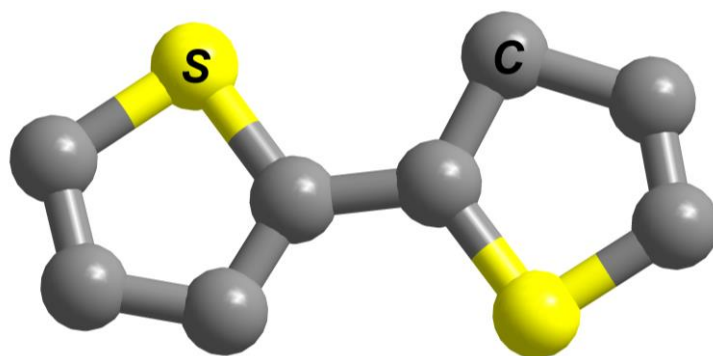

**Fig. S4** The molecular structure of **2T**, the H-bond had been omitted for clarity.

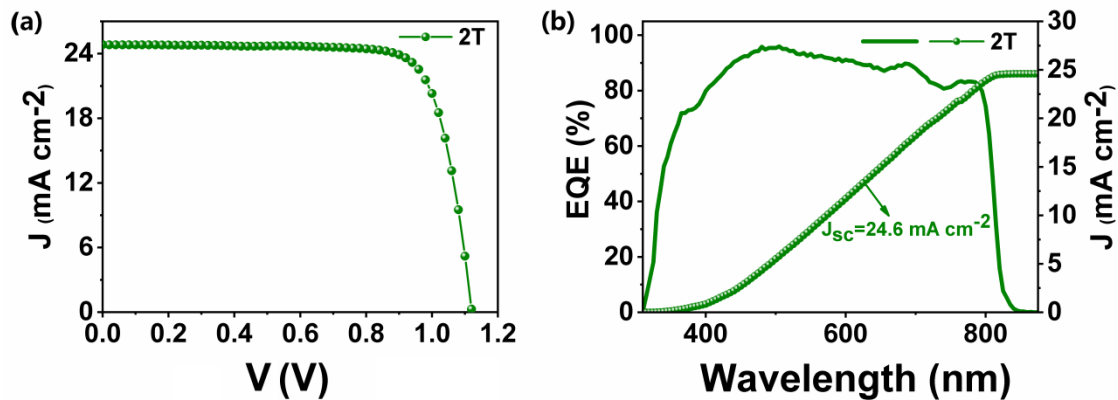

**Fig. S5** Device performance. (a)  $J$ - $V$  characteristics and (b) EQE spectra of the 2T-modified PVSCs.

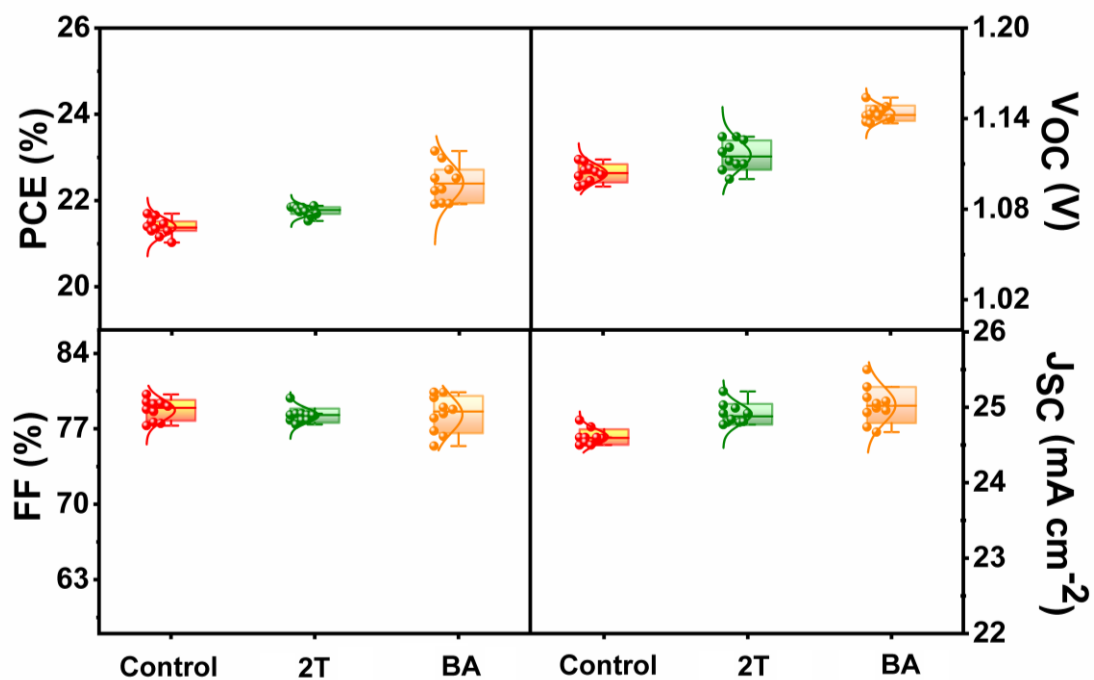

**Fig. S6** PCE,  $V_{oc}$ , FF, and  $J_{sc}$  distribution statistics for 30 devices (10 control devices, 10 2T-modified devices, and 10 BAI-modified devices).

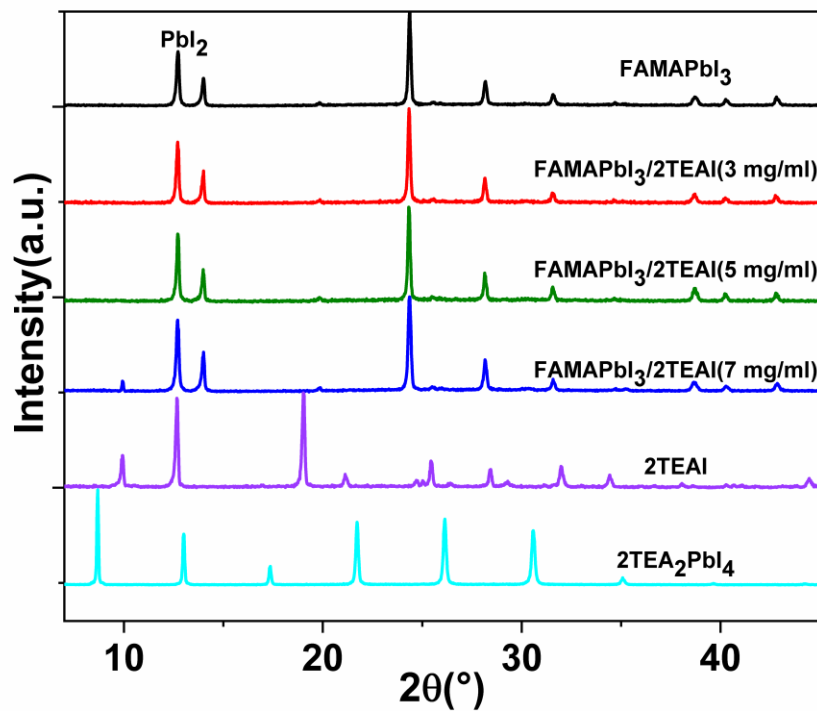

**Fig. S7** XRD patterns of perovskite films before and after **2TEAI** treatment. The diffraction patterns of the **(2TEAI)<sub>2</sub>PbI<sub>4</sub>** film are also shown.

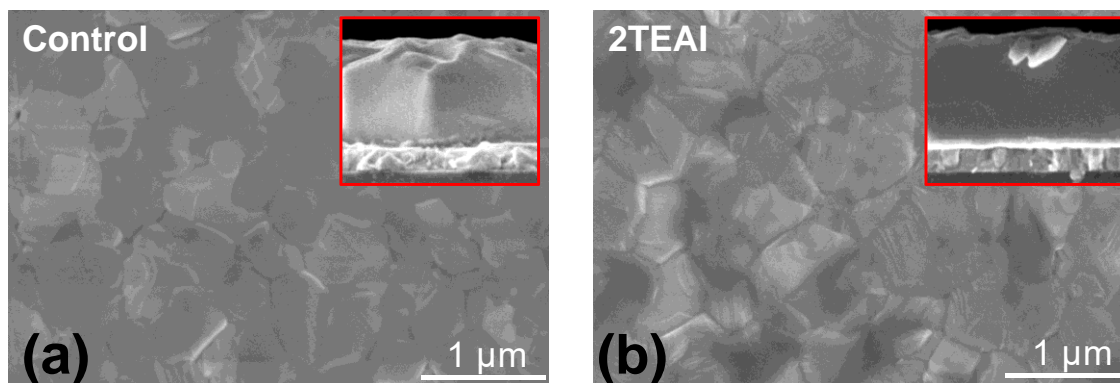

**Fig. S8** Cross-sectional SEM images of perovskite solar cells with and without **2TEAI** modification.

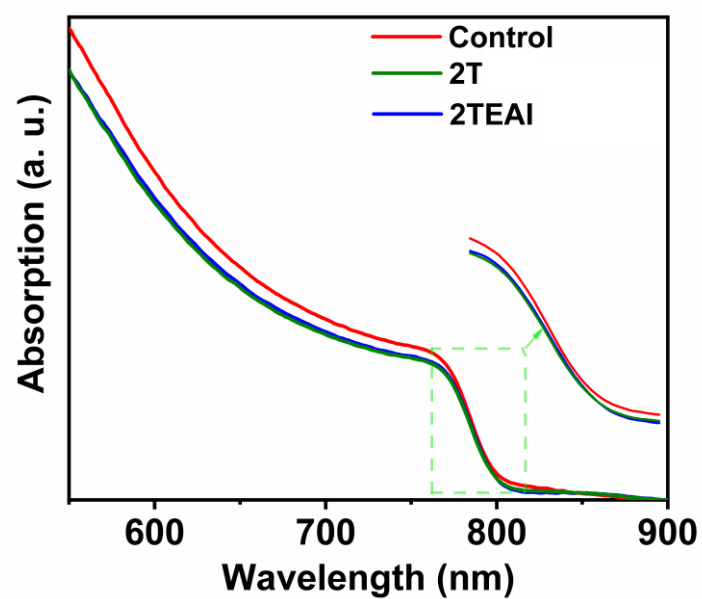

**Fig. S9** UV-vis spectra of the control, 2T-modified, and 2TEAI-modified perovskite films.

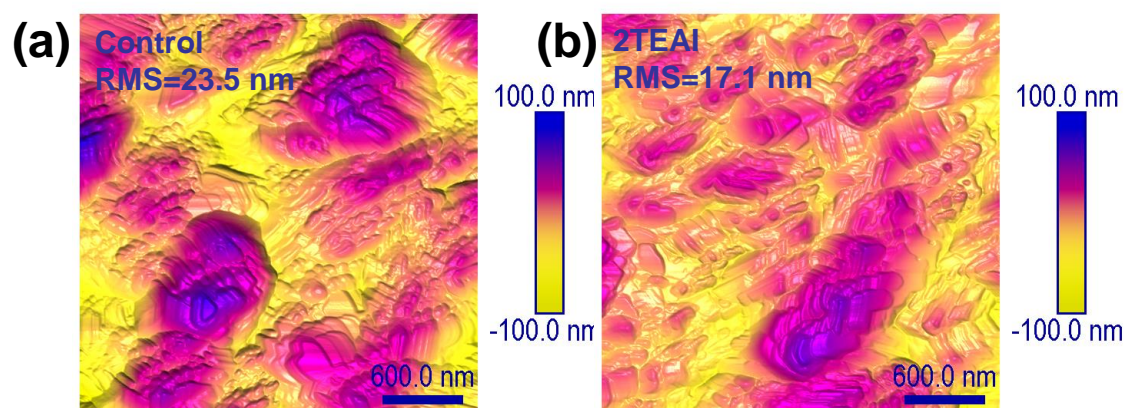

**Fig. S10** AFM images of control and 2TEAI-modified perovskite films.

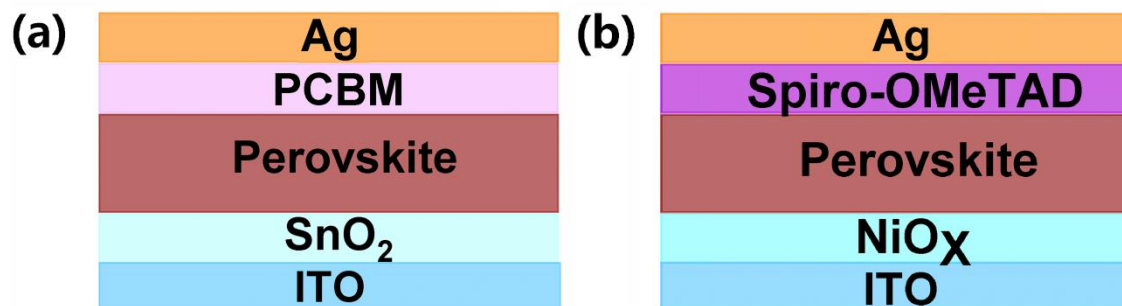

**Fig. S11** The device architecture used for SCLC measurements. (a) the electron-only device; (b) hole-only device.

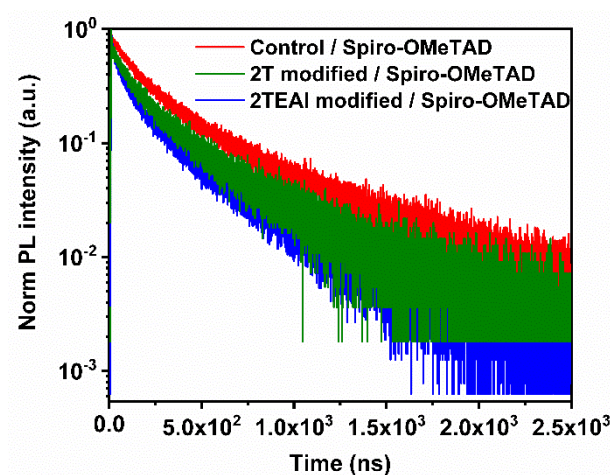

**Fig. S12** Time-resolved PL at the perovskite films with and without 2TEAI/2T modification.



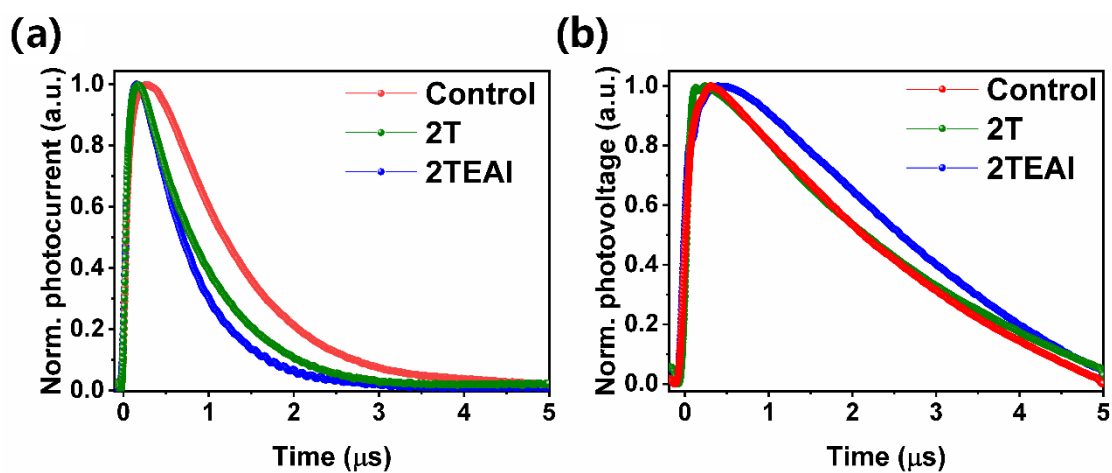

**Fig. S13** (a) TPC decay kinetics of PVSCs with and without 2TEAI/2T modification.

(b) TPV decay kinetics of PVSCs with and without 2TEAI/2T modification.

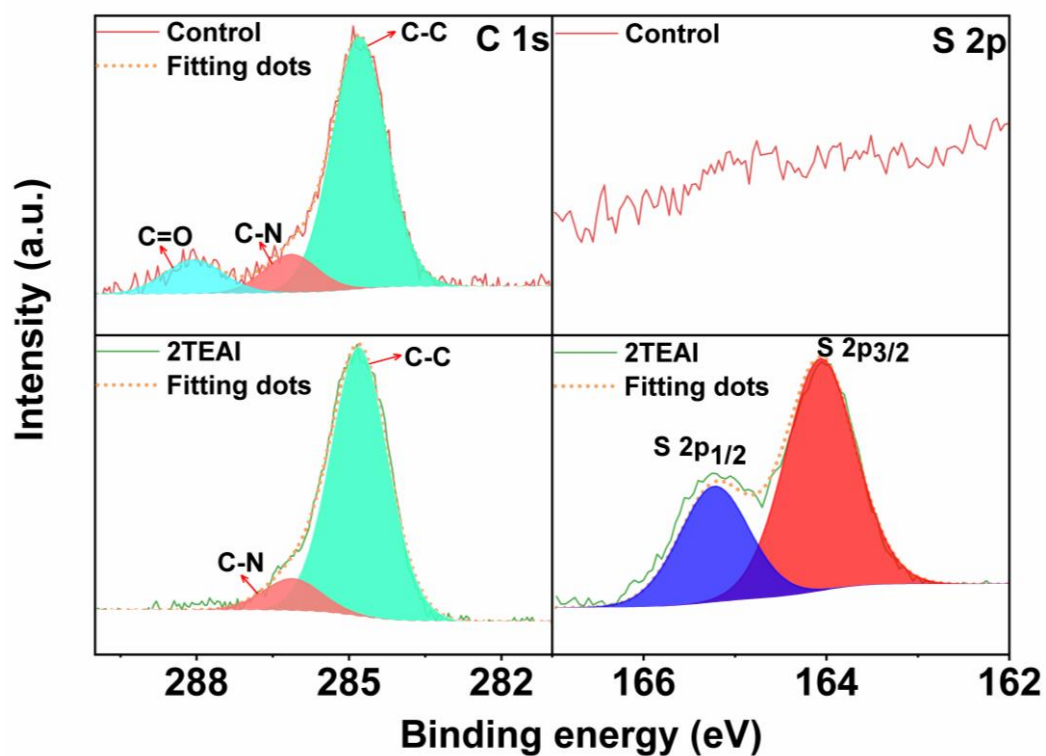

**Fig. S14** The high-resolution XPS spectra of the C 1s and S 2p of perovskite films without and with 2TEAI modification.

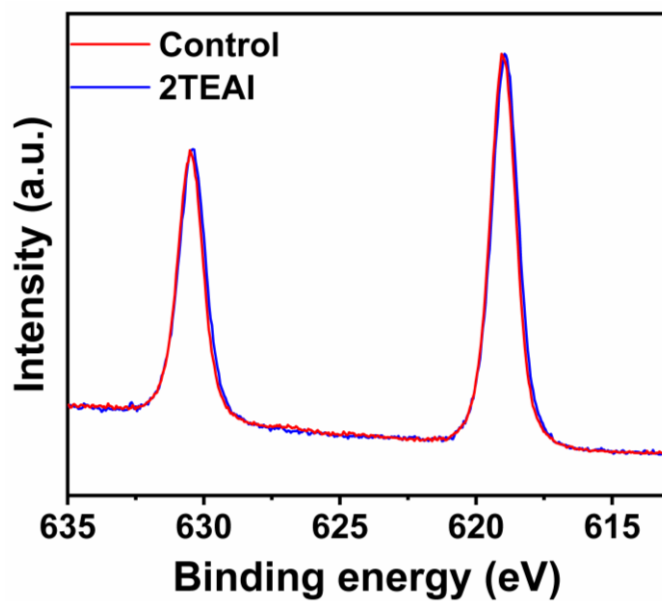

**Fig. S15** The high-resolution XPS spectra of the I 3d of perovskite films without and with **2TEAI** modification.

**Control**

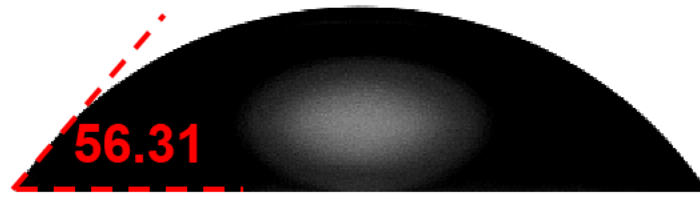

**With 2TEAI**

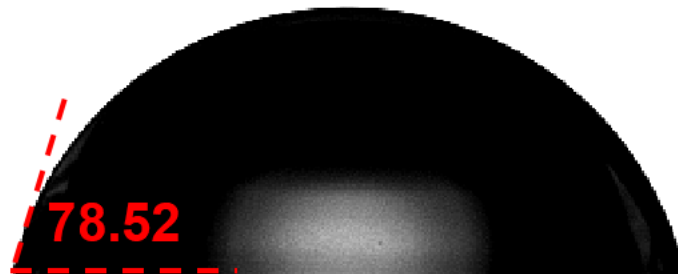

**Fig. S16** The contact angles between the perovskite precursor solutions (for the control and with **2TEAI**, respectively) and the substrates.

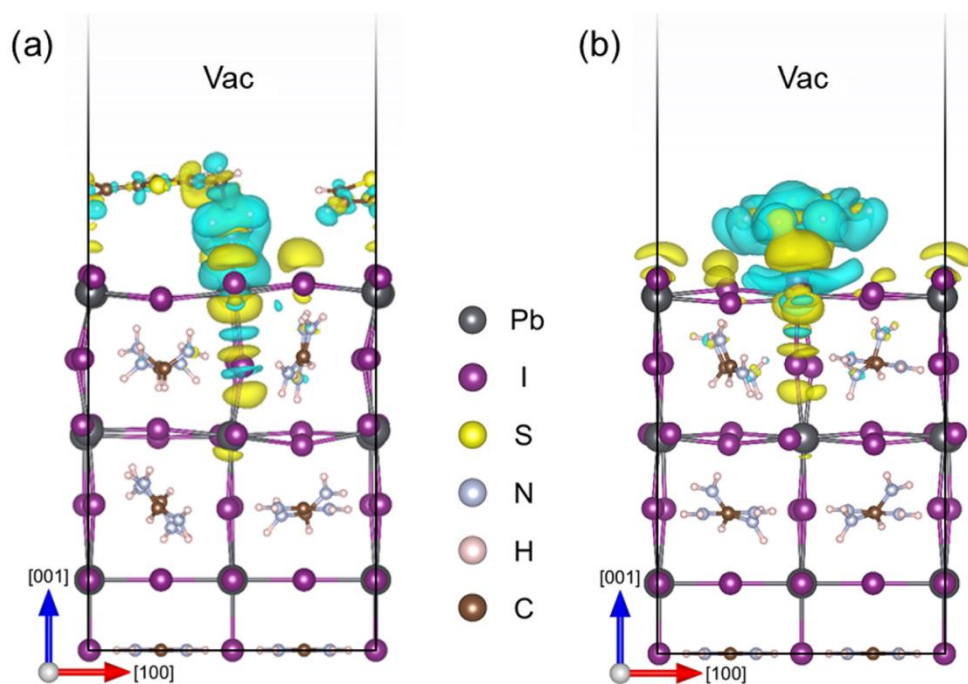

**Fig. S17** The iso-surface plots of differential charge distribution of the FAPbI<sub>3</sub> film surface with (a) 2TEAI molecule adsorption and (b) 2T molecule adsorption. These pictures are produced by VESTA.<sup>1</sup>

## References

- 1 K. Momma, F. Izumi, *J. Appl. Crystallogr.*, 2008, **41**, 653.
